# Supplementary material
Source: Springer Nature journal article supplement (https://www.springermedizin.de/resource/supplementary/12885_2013_4176_MOESM6_ESM.pdf/9465660)
Supplement: MOESM6 [file 9465660]

A)

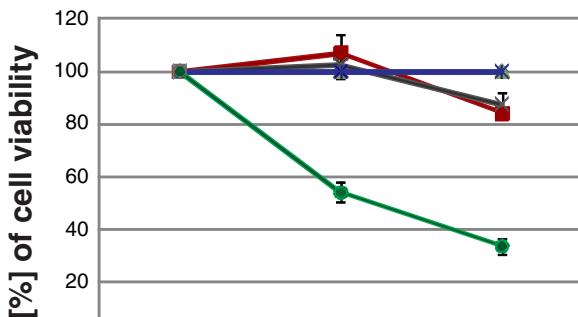

|                     | 0 HRS  | 24 HRS | 48 HRS |
|---------------------|--------|--------|--------|
| BJAB                | 100.00 | 100.00 | 100.00 |
| BJAB+Doxy           | 100.00 | 106.94 | 84.14  |
| BJAB-Tet            | 100.00 | 100.00 | 100.00 |
| BJAB-Tet +Doxy      | 100.00 | 102.55 | 87.65  |
| BJAB-Tet-WNT4       | 100.00 | 100.00 | 100.00 |
| BJAB-Tet-WNT4 +Doxy | 100.00 | 54.11  | 33.84  |

B)

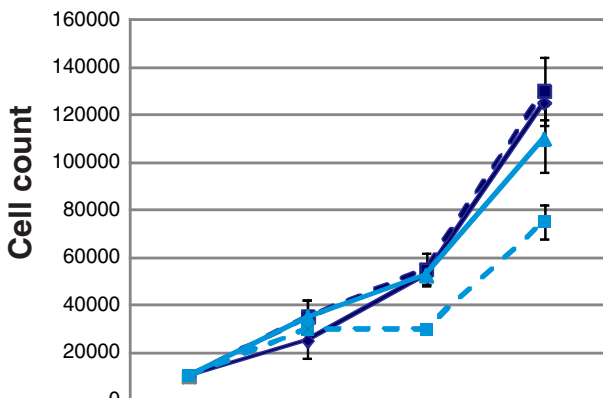

|                      | 0 HRS | 24 HRS | 48 HRS | 72 HRS |
|----------------------|-------|--------|--------|--------|
| BJAB                 | 10000 | 25000  | 52500  | 125000 |
| BJAB + Doxy          | 10000 | 35000  | 55000  | 130000 |
| BJAB-Tet-WNT4        | 10000 | 35000  | 52500  | 110000 |
| BJAB-Tet-WNT4 + Doxy | 10000 | 30000  | 30000  | 75000  |
